# Supplementary material for: Comparative genomics of Botryosphaeria dothidea and B. kuwatsukai, causal agents of apple ring rot, reveals both species expansion of pathogenicity-related genes and variations in virulence gene content during speciation
Source: PubMed Central journal article supplement — IMA Fungus. 2018 Aug 20;9:243–57. doi: 10.5598/imafungus.2018.09.02.02 (PMC6317582; doi:10.5598/imafungus.2018.09.02.02), 2018-08-20
Supplement: ima-9-243-SD4.pdf [file ima-9-243-SD4.pdf]

**Table S4: GO terms enrichment of genes in TE-rich region of *B.dothidea* .**

| GO-ID     | Term               | Category | P-value  | #Test | #Ref |
|-----------|--------------------|----------|----------|-------|------|
| GO:000573 | cytoplasm          | C        | 1.83E-05 | 360   | 1799 |
| GO:004476 | single-organelle   | P        | 2.88E-05 | 284   | 1376 |
| GO:004444 | cytoplasmic        | C        | 4.74E-05 | 310   | 1534 |
| GO:000829 | isoprenoid         | I P      | 1.59E-04 | 11    | 13   |
| GO:000672 | isoprenoid         | I P      | 1.77E-04 | 12    | 16   |
| GO:190156 | organonitro        | P        | 3.45E-04 | 161   | 744  |
| GO:004446 | cell part          | C        | 6.22E-04 | 540   | 2961 |
| GO:000562 | cell               | C        | 6.39E-04 | 542   | 2974 |
| GO:004442 | intracellular      | C        | 6.72E-04 | 498   | 2710 |
| GO:004444 | intracellular      | C        | 7.92E-04 | 262   | 1327 |
| GO:000998 | cellular pro       | P        | 8.25E-04 | 575   | 3183 |
| GO:004442 | organelle part     | C        | 8.91E-04 | 262   | 1330 |
| GO:003299 | macromolecule      | C        | 9.33E-04 | 252   | 1274 |
| GO:000562 | intracellular      | C        | 9.87E-04 | 513   | 2813 |
| GO:003422 | ion transmembrane  | P        | 1.11E-03 | 71    | 288  |
| GO:001507 | hydrogen ion       | F        | 1.36E-03 | 40    | 139  |
| GO:001507 | ion transmembrane  | F        | 1.42E-03 | 79    | 332  |
| GO:009865 | cation trans       | P        | 1.65E-03 | 54    | 208  |
| GO:002289 | inorganic cation   | F        | 1.77E-03 | 52    | 199  |
| GO:001507 | monovalent         | F        | 2.00E-03 | 42    | 152  |
| GO:000603 | chitin catabolism  | P        | 2.02E-03 | 5     | 3    |
| GO:001683 | carbon-oxygen      | F        | 2.02E-03 | 5     | 3    |
| GO:000456 | chitinase activity | F        | 2.02E-03 | 5     | 3    |
| GO:000602 | aminoglycoside     | P        | 2.02E-03 | 5     | 3    |
| GO:000942 | chorismate         | P        | 2.02E-03 | 5     | 3    |
| GO:000832 | cation trans       | F        | 2.15E-03 | 63    | 256  |
| GO:001620 | antioxidant        | F        | 2.18E-03 | 18    | 46   |
| GO:009866 | inorganic ion      | P        | 2.24E-03 | 48    | 182  |
| GO:000603 | chitin metal       | P        | 2.31E-03 | 7     | 8    |
| GO:001646 | proton-transport   | C        | 2.35E-03 | 34    | 116  |
| GO:190156 | organonitro        | P        | 2.69E-03 | 120   | 560  |
| GO:003367 | DNA/RNA            | F        | 2.69E-03 | 3     | 0    |
| GO:000410 | chorismate         | F        | 2.69E-03 | 3     | 0    |
| GO:000026 | peroxisome         | F        | 2.69E-03 | 3     | 0    |
| GO:003325 | vacuolar transport | C        | 2.69E-03 | 3     | 0    |
| GO:009913 | ATP hydrolase      | P        | 2.90E-03 | 31    | 104  |
| GO:009913 | ATP hydrolase      | P        | 2.90E-03 | 31    | 104  |
| GO:009066 | ATP hydrolase      | P        | 2.90E-03 | 31    | 104  |
| GO:001599 | ATP hydrolase      | P        | 2.90E-03 | 31    | 104  |

|                         |   |          |     |      |
|-------------------------|---|----------|-----|------|
| GO:001598 energy coup   | P | 2.90E-03 | 31  | 104  |
| GO:003109 organelle m   | C | 3.13E-03 | 71  | 302  |
| GO:000653 cysteine me   | P | 3.14E-03 | 6   | 6    |
| GO:000963 response to   | P | 3.15E-03 | 18  | 48   |
| GO:009866 inorganic c   | P | 3.16E-03 | 46  | 176  |
| GO:001986 organelle in  | C | 3.33E-03 | 29  | 96   |
| GO:000602 aminoglyca    | P | 3.62E-03 | 7   | 9    |
| GO:003130 integral con  | C | 3.67E-03 | 8   | 12   |
| GO:000460 peroxidase    | F | 3.70E-03 | 14  | 33   |
| GO:000652 cellular ami  | P | 3.82E-03 | 56  | 228  |
| GO:004641 chorismate    | P | 4.02E-03 | 5   | 4    |
| GO:001517 neutral ami   | F | 4.44E-03 | 4   | 2    |
| GO:190260 hydrogen ic   | P | 4.45E-03 | 37  | 136  |
| GO:009886 cellular oxi  | P | 4.57E-03 | 17  | 46   |
| GO:000577 vacuole       | C | 4.78E-03 | 29  | 99   |
| GO:003317 proton-tran   | C | 4.98E-03 | 30  | 104  |
| GO:004322 intracellular | C | 5.10E-03 | 418 | 2300 |
| GO:001688 acid-amino    | F | 5.15E-03 | 6   | 7    |
| GO:004693 proton-tran   | F | 5.15E-03 | 6   | 7    |
| GO:003130 intrinsic cor | C | 5.22E-03 | 8   | 13   |
| GO:004322 organelle     | C | 5.38E-03 | 418 | 2302 |
| GO:000578 endoplasmic   | C | 5.76E-03 | 51  | 208  |
| GO:003317 proton-tran   | C | 5.77E-03 | 28  | 96   |
| GO:000639 mRNA proc     | P | 6.20E-03 | 27  | 92   |
| GO:001675 transferase   | F | 6.20E-03 | 18  | 52   |
| GO:199074 cellular det  | P | 6.43E-03 | 17  | 48   |
| GO:009875 detoxificati  | P | 6.43E-03 | 17  | 48   |
| GO:000367 DNA helica    | F | 6.44E-03 | 9   | 17   |
| GO:004634 amino suga    | P | 7.12E-03 | 5   | 5    |
| GO:190107 glucosamin    | P | 7.12E-03 | 5   | 5    |
| GO:000681 ion transpor  | P | 7.20E-03 | 87  | 400  |
| GO:000907 aromatic an   | P | 7.81E-03 | 7   | 11   |
| GO:190107 glucosamin    | P | 7.81E-03 | 7   | 11   |
| GO:001508 calcium ion   | F | 7.81E-03 | 7   | 11   |
| GO:000574 mitochondr    | C | 7.82E-03 | 27  | 94   |
| GO:004469 single-orga   | P | 7.95E-03 | 507 | 2854 |
| GO:003425 positive reg  | P | 7.96E-03 | 6   | 8    |
| GO:000022 microtubule   | P | 8.05E-03 | 15  | 41   |
| GO:003250 DNA duple     | P | 8.48E-03 | 9   | 18   |
| GO:001593 large riboso  | C | 8.86E-03 | 17  | 50   |
| GO:001607 mRNA met      | P | 9.21E-03 | 34  | 129  |
| GO:000409 catalase act  | F | 9.22E-03 | 4   | 3    |

|                           |          |     |      |
|---------------------------|----------|-----|------|
| GO:000679 polyphosph P    | 9.22E-03 | 4   | 3    |
| GO:000602 inositol met P  | 9.22E-03 | 4   | 3    |
| GO:000706 mitotic nucl P  | 9.31E-03 | 23  | 77   |
| GO:001567 monovalent P    | 9.55E-03 | 42  | 169  |
| GO:199011 ribosome-as P   | 9.65E-03 | 3   | 1    |
| GO:004617 polyol biosy P  | 9.65E-03 | 3   | 1    |
| GO:003103 negative reξ P  | 9.65E-03 | 3   | 1    |
| GO:001663 oxidoreduct F   | 9.65E-03 | 3   | 1    |
| GO:001097 negative reξ P  | 9.65E-03 | 3   | 1    |
| GO:199011 RQC compl C     | 9.65E-03 | 3   | 1    |
| GO:190189 negative reξ P  | 9.65E-03 | 3   | 1    |
| GO:001700 cytochrome P    | 9.74E-03 | 8   | 15   |
| GO:000647 protein depl P  | 9.97E-03 | 12  | 30   |
| GO:003609 small molec F   | 1.06E-02 | 207 | 1083 |
| GO:000701 microtubule P   | 1.07E-02 | 19  | 60   |
| GO:008013 regulation c P  | 1.10E-02 | 9   | 19   |
| GO:001668 oxidoreduct F   | 1.17E-02 | 14  | 39   |
| GO:007250 divalent ino F  | 1.17E-02 | 10  | 23   |
| GO:001665 oxidoreduct F   | 1.21E-02 | 12  | 31   |
| GO:001599 proton trans P  | 1.23E-02 | 39  | 157  |
| GO:000681 hydrogen tr P   | 1.23E-02 | 39  | 157  |
| GO:000028 nuclear divi P  | 1.28E-02 | 30  | 113  |
| GO:004828 organelle fi. P | 1.30E-02 | 31  | 118  |
| GO:004323 protein com C   | 1.35E-02 | 165 | 849  |
| GO:000695 response to P   | 1.36E-02 | 75  | 347  |
| GO:003317 proton-trans: C | 1.37E-02 | 28  | 104  |
| GO:004323 intracellular C | 1.37E-02 | 378 | 2099 |
| GO:004322 membrane-l C    | 1.37E-02 | 382 | 2123 |
| GO:009879 membrane l C    | 1.38E-02 | 51  | 220  |
| GO:003239 DNA geom P      | 1.40E-02 | 9   | 20   |
| GO:004362 cellular pro P  | 1.48E-02 | 7   | 13   |
| GO:004360 amide biosy P   | 1.53E-02 | 72  | 333  |
| GO:004526 proton-trans: C | 1.64E-02 | 4   | 4    |
| GO:001934 cysteine bic P  | 1.64E-02 | 4   | 4    |
| GO:005089 response to P   | 1.65E-02 | 116 | 577  |
| GO:001517 L-amino aci F   | 1.66E-02 | 6   | 10   |
| GO:004324 protein com P   | 1.67E-02 | 8   | 17   |
| GO:003130 intrinsic cor C | 1.70E-02 | 18  | 59   |
| GO:008013 regulation c P  | 1.76E-02 | 9   | 21   |
| GO:002289 substrate-sp F  | 1.76E-02 | 90  | 434  |
| GO:000681 cation trans P  | 1.81E-02 | 61  | 277  |
| GO:004323 intracellular C | 1.82E-02 | 125 | 630  |

|                           |          |     |     |
|---------------------------|----------|-----|-----|
| GO:004322 non-membr C     | 1.82E-02 | 125 | 630 |
| GO:000573 mitochondr C    | 1.89E-02 | 81  | 386 |
| GO:004439 ribosomal s C   | 1.93E-02 | 25  | 93  |
| GO:001661 hydroxypyr F    | 1.94E-02 | 2   | 0   |
| GO:003324 positive reg P  | 1.94E-02 | 2   | 0   |
| GO:190244 regulation c P  | 1.94E-02 | 2   | 0   |
| GO:000416 diphosphon F    | 1.94E-02 | 2   | 0   |
| GO:190009 positive reg P  | 1.94E-02 | 2   | 0   |
| GO:000662 vacuolar pr P   | 1.94E-02 | 2   | 0   |
| GO:190100 ubiquinone- P   | 1.94E-02 | 2   | 0   |
| GO:190010 regulation c P  | 1.94E-02 | 2   | 0   |
| GO:001672 oxidoreduct F   | 1.94E-02 | 2   | 0   |
| GO:190037 positive reg P  | 1.94E-02 | 2   | 0   |
| GO:000485 xanthine de F   | 1.94E-02 | 2   | 0   |
| GO:001711 single-stran F  | 1.94E-02 | 2   | 0   |
| GO:200102 positive reg P  | 1.94E-02 | 2   | 0   |
| GO:000218 cytoplasmic P   | 1.94E-02 | 2   | 0   |
| GO:004526 proton-trans C  | 1.94E-02 | 2   | 0   |
| GO:190008 regulation c P  | 1.94E-02 | 2   | 0   |
| GO:003367 3'-5' DNA/F F   | 1.94E-02 | 2   | 0   |
| GO:001844 translation r C | 1.94E-02 | 2   | 0   |
| GO:190577 regulation c P  | 1.94E-02 | 2   | 0   |
| GO:199051 single-stran F  | 1.94E-02 | 2   | 0   |
| GO:004245 arginine bic P  | 1.94E-02 | 2   | 0   |
| GO:000997 cyclase acti F  | 1.94E-02 | 2   | 0   |
| GO:190003 regulation c P  | 1.94E-02 | 2   | 0   |
| GO:003069 Noc4p-Nop C     | 1.94E-02 | 2   | 0   |
| GO:190100 ubiquinone- P   | 1.94E-02 | 2   | 0   |
| GO:190245 negative reg P  | 1.94E-02 | 2   | 0   |
| GO:003150 dolichyl-ph C   | 1.94E-02 | 2   | 0   |
| GO:000472 oxygen-dep F    | 1.94E-02 | 2   | 0   |
| GO:004594 positive reg P  | 1.94E-02 | 2   | 0   |
| GO:007081 protoporph F    | 1.94E-02 | 2   | 0   |
| GO:003026 glyoxylate r F  | 1.94E-02 | 2   | 0   |
| GO:190577 negative reg P  | 1.94E-02 | 2   | 0   |
| GO:000032 re-entry int P  | 1.94E-02 | 2   | 0   |
| GO:190546 regulation c P  | 1.94E-02 | 2   | 0   |
| GO:004277 mitochondr P    | 1.94E-02 | 2   | 0   |
| GO:000575 mitochondr C    | 1.94E-02 | 2   | 0   |
| GO:009865 import into P   | 1.94E-02 | 2   | 0   |
| GO:004484 chain elong P   | 1.94E-02 | 2   | 0   |
| GO:009737 MCM core C      | 1.94E-02 | 2   | 0   |

|                                |          |     |      |
|--------------------------------|----------|-----|------|
| GO:004573 positive reg P       | 1.94E-02 | 2   | 0    |
| GO:190546 negative reg P       | 1.94E-02 | 2   | 0    |
| GO:000604 amino sugar P        | 1.96E-02 | 7   | 14   |
| GO:004442 mitochondr C         | 2.08E-02 | 50  | 221  |
| GO:190241 negative reg P       | 2.16E-02 | 3   | 2    |
| GO:005141 microtubule P        | 2.16E-02 | 3   | 2    |
| GO:003246 negative reg P       | 2.16E-02 | 3   | 2    |
| GO:000807 translation t F      | 2.16E-02 | 3   | 2    |
| GO:001666 oxidoreduct F        | 2.16E-02 | 3   | 2    |
| GO:000374 translation r F      | 2.16E-02 | 3   | 2    |
| GO:005141 interphase r P       | 2.16E-02 | 3   | 2    |
| GO:190343 negative reg P       | 2.16E-02 | 3   | 2    |
| GO:000825 oligosaccha C        | 2.16E-02 | 3   | 2    |
| GO:005178 negative reg P       | 2.16E-02 | 3   | 2    |
| GO:003193 TORC2 cor C          | 2.16E-02 | 3   | 2    |
| GO:190403 positive reg P       | 2.16E-02 | 3   | 2    |
| GO:003462 cellular res P       | 2.16E-02 | 3   | 2    |
| GO:004353 ADP bindin F         | 2.16E-02 | 3   | 2    |
| GO:003096 endoplasmic P        | 2.16E-02 | 3   | 2    |
| GO:000888 glycerophos F        | 2.16E-02 | 3   | 2    |
| GO:000373 structural c F       | 2.21E-02 | 32  | 129  |
| GO:001604 cellular con P       | 2.25E-02 | 146 | 755  |
| GO:003460 cellular res P       | 2.27E-02 | 6   | 11   |
| GO:002289 substrate-sp F       | 2.34E-02 | 95  | 468  |
| GO:000651 peptide met P        | 2.49E-02 | 69  | 326  |
| GO:004426 cellular pro P       | 2.49E-02 | 157 | 821  |
| GO:190126 nucleoside j F       | 2.50E-02 | 195 | 1041 |
| GO:000016 nucleotide t F       | 2.50E-02 | 195 | 1041 |
| GO:004304 peptide bio: P       | 2.53E-02 | 66  | 310  |
| GO:000641 translationa P       | 2.54E-02 | 5   | 8    |
| GO:000372 single-stran F       | 2.54E-02 | 5   | 8    |
| GO:000853 respiratory r P      | 2.54E-02 | 5   | 8    |
| GO:000678 heme biosyn P        | 2.54E-02 | 5   | 8    |
| GO:004365 dicarboxylic P       | 2.54E-02 | 7   | 15   |
| GO:004858 regulation c P       | 2.56E-02 | 19  | 67   |
| GO:004445 nucleoplasm C        | 2.61E-02 | 31  | 126  |
| GO:003259 integral con C       | 2.63E-02 | 10  | 27   |
| GO:004274 hydrogen peroxide P  | 2.64E-02 | 4   | 5    |
| GO:004313 3'-5' DNA h F        | 2.64E-02 | 4   | 5    |
| GO:003295 regulation c P       | 2.64E-02 | 4   | 5    |
| GO:001580 neutral amino acid P | 2.64E-02 | 4   | 5    |
| GO:001685 racemase ar F        | 2.64E-02 | 4   | 5    |

|                           |          |     |      |
|---------------------------|----------|-----|------|
| GO:001920 nucleotide l F  | 2.64E-02 | 4   | 5    |
| GO:000574 mitochondr C    | 2.72E-02 | 36  | 152  |
| GO:004360 cellular ami P  | 2.83E-02 | 76  | 367  |
| GO:000865 cellular ami P  | 2.84E-02 | 25  | 97   |
| GO:007184 cellular con P  | 2.86E-02 | 167 | 883  |
| GO:000577 vacuolar me C   | 2.86E-02 | 19  | 68   |
| GO:000372 RNA bindir F    | 2.95E-02 | 66  | 313  |
| GO:009757 vacuole fus: P  | 3.01E-02 | 6   | 12   |
| GO:000400 ATP-depen F     | 3.01E-02 | 6   | 12   |
| GO:004214 vacuole fus: P  | 3.01E-02 | 6   | 12   |
| GO:007259 reactive oxy P  | 3.01E-02 | 6   | 12   |
| GO:004525 proton-tran: C  | 3.01E-02 | 6   | 12   |
| GO:000679 sulfur comp P   | 3.07E-02 | 23  | 88   |
| GO:000701 cytoskeleton P  | 3.09E-02 | 24  | 93   |
| GO:004443 Golgi appar C   | 3.10E-02 | 18  | 64   |
| GO:009857 intrinsic coi C | 3.14E-02 | 10  | 28   |
| GO:004443 vacuolar pa C   | 3.19E-02 | 19  | 69   |
| GO:004476 ATPase act F    | 3.22E-02 | 7   | 16   |
| GO:003112 mRNA 3'-ei P    | 3.22E-02 | 7   | 16   |
| GO:002283 substrate-sp F  | 3.22E-02 | 7   | 16   |
| GO:000705 spindle org: P  | 3.28E-02 | 8   | 20   |
| GO:000027 mitotic cell P  | 3.28E-02 | 38  | 165  |
| GO:006500 protein-DN. P   | 3.33E-02 | 14  | 46   |
| GO:000032 lytic vacuol C  | 3.35E-02 | 22  | 84   |
| GO:004471 single-orga P   | 3.44E-02 | 88  | 438  |
| GO:004216 heme meta P     | 3.51E-02 | 5   | 9    |
| GO:001677 phosphotra F    | 3.51E-02 | 5   | 9    |
| GO:003355 cellular res P  | 3.57E-02 | 62  | 295  |
| GO:000032 storage vaci C  | 3.65E-02 | 21  | 80   |
| GO:000032 fungal-type C   | 3.65E-02 | 21  | 80   |
| GO:005066 coenzyme b F    | 3.67E-02 | 63  | 301  |
| GO:004423 cellular met P  | 3.75E-02 | 452 | 2591 |
| GO:000565 nucleoplasn C   | 3.77E-02 | 33  | 141  |
| GO:000641 translation P   | 3.85E-02 | 63  | 302  |
| GO:001683 carbon-oxy; F   | 3.86E-02 | 18  | 66   |
| GO:007251 divalent ino P  | 3.88E-02 | 9   | 25   |
| GO:003298 macromolec P    | 3.88E-02 | 9   | 25   |
| GO:000472 phosphopro F    | 3.88E-02 | 9   | 25   |
| GO:007083 divalent me P   | 3.88E-02 | 9   | 25   |
| GO:001056 regulation c P  | 3.88E-02 | 3   | 3    |
| GO:190331 regulation c P  | 3.88E-02 | 3   | 3    |
| GO:007239 signal trans: P | 3.88E-02 | 3   | 3    |

|                           |          |     |     |
|---------------------------|----------|-----|-----|
| GO:003323 regulation c P  | 3.88E-02 | 3   | 3   |
| GO:000711 budding cel P   | 3.88E-02 | 3   | 3   |
| GO:000661 protein exp P   | 3.88E-02 | 3   | 3   |
| GO:004255 MCM com C       | 3.88E-02 | 3   | 3   |
| GO:000092 equatorial n C  | 3.88E-02 | 3   | 3   |
| GO:001685 racemase ar F   | 3.88E-02 | 3   | 3   |
| GO:007058 calcium ion P   | 3.90E-02 | 6   | 13  |
| GO:003129 replication i C | 3.92E-02 | 4   | 6   |
| GO:190189 regulation c P  | 3.92E-02 | 4   | 6   |
| GO:005130 cell divisior P | 3.93E-02 | 19  | 71  |
| GO:000627 DNA replic P    | 3.99E-02 | 8   | 21  |
| GO:000681 calcium ion P   | 4.02E-02 | 7   | 17  |
| GO:005112 negative re P   | 4.09E-02 | 13  | 43  |
| GO:000098 transcriptio: F | 4.09E-02 | 13  | 43  |
| GO:000582 cytosol C       | 4.25E-02 | 131 | 688 |
| GO:000838 RNA splici P    | 4.28E-02 | 18  | 67  |
| GO:000371 transcriptio: F | 4.36E-02 | 10  | 30  |
| GO:000009 sulfur amin P   | 4.36E-02 | 10  | 30  |
| GO:001683 hydro-lyase F   | 4.40E-02 | 12  | 39  |
| GO:001063 negative re P   | 4.40E-02 | 12  | 39  |
| GO:190304 mitotic cell P  | 4.50E-02 | 35  | 154 |
| GO:003130 integral con C  | 4.58E-02 | 16  | 58  |
| GO:005171 cellular res P  | 4.58E-02 | 94  | 479 |
| GO:002285 transmembr F    | 4.63E-02 | 101 | 519 |
| GO:000581 spindle pole C  | 4.67E-02 | 17  | 63  |
| GO:000629 mismatch re P   | 4.67E-02 | 5   | 10  |
| GO:000677 porphyrin-c P   | 4.67E-02 | 5   | 10  |
| GO:000575 mitochondr C    | 4.67E-02 | 5   | 10  |
| GO:001563 microtubule C   | 4.68E-02 | 27  | 113 |
| GO:003196 mitochondr C    | 4.79E-02 | 31  | 134 |
| GO:001598 energy cou P    | 4.93E-02 | 6   | 14  |
| GO:001598 ATP synthe P    | 4.93E-02 | 6   | 14  |

---
